# Supplementary material for: Ultra-high rate capability of the synergistically built dual nanostructure of NiCo2S4/nickel foam as an electrode in supercapacitors
Source: Royal Society of Chemistry journal article supplement (doi:10.1039/d0nr06450e), 2020-01-01
Supplement: d0nr06450e1.pdf [file d0nr06450e1.pdf]

## Ultra-high rate capability of synergistically built dual-nanostructures of $\text{NiCo}_2\text{S}_4$ /nickel foam as an electrode in supercapacitors

Pengfei Liu, Yuanyuan Liu, Jing Li, Meiri Wang, Hongtao Cui\*

*School of Chemistry and Chemical Engineering, Yantai University, 264005 Yantai, China*

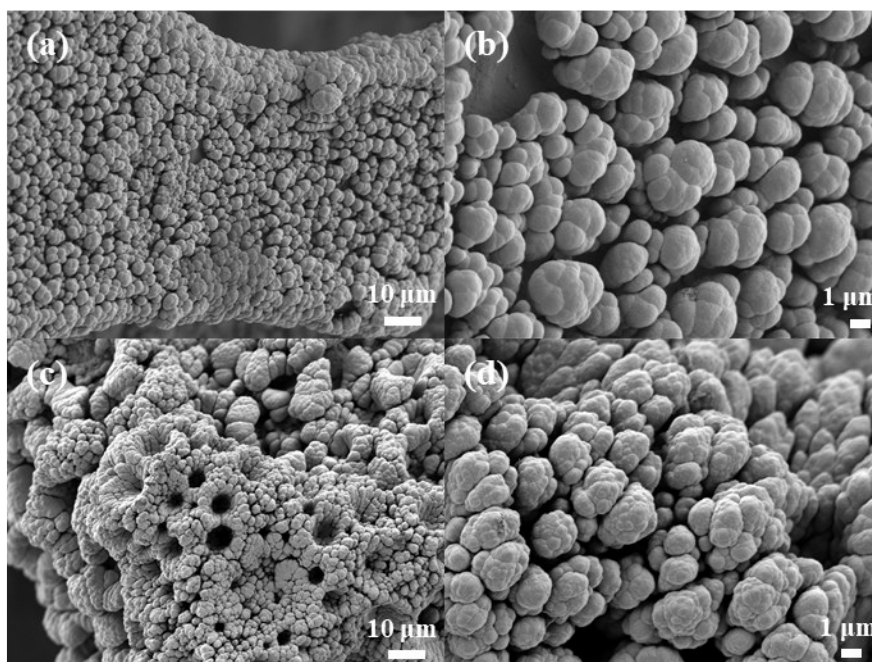

**Fig. S1** FE-SEM images of the two NFs respectively nanoengineered at (a-b) 3 V and (c-d) 5 V for 60 s.

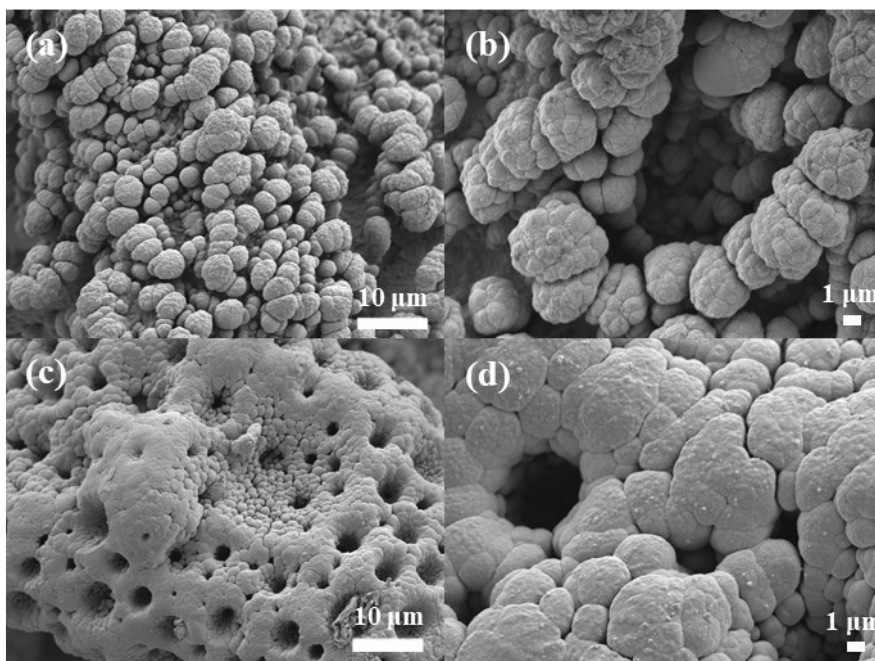

**Fig. S2** FE-SEM images of the two NFs respectively nanoengineered at 4V for (a-b) 30s and (c-d) 90s.

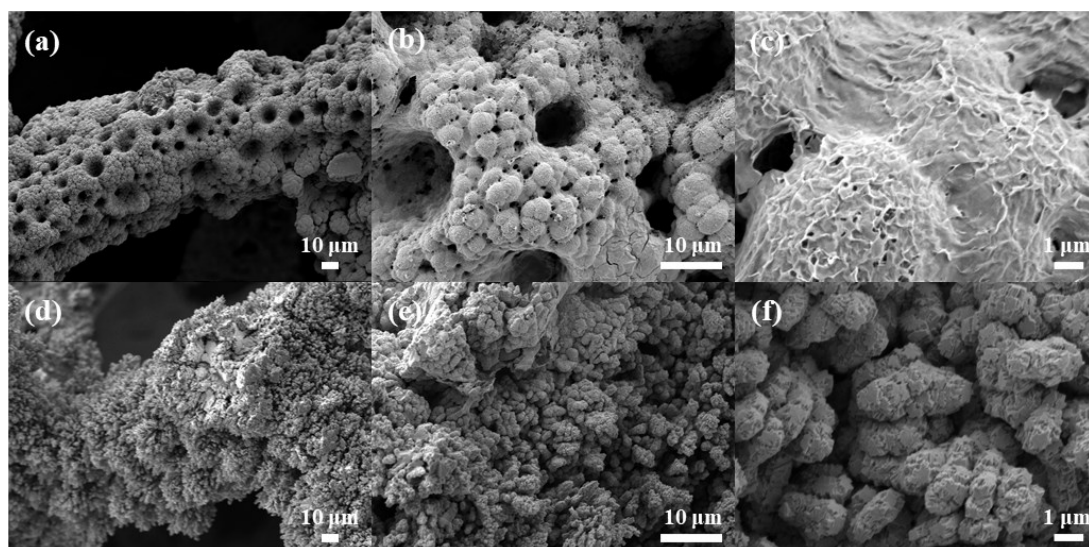

**Fig. S3** FE-SEM images of  $\text{NiCo}_2\text{S}_4$  deposited on nanoengineered NFs respectively for (a-c) 10h and (d-f) 30 h.

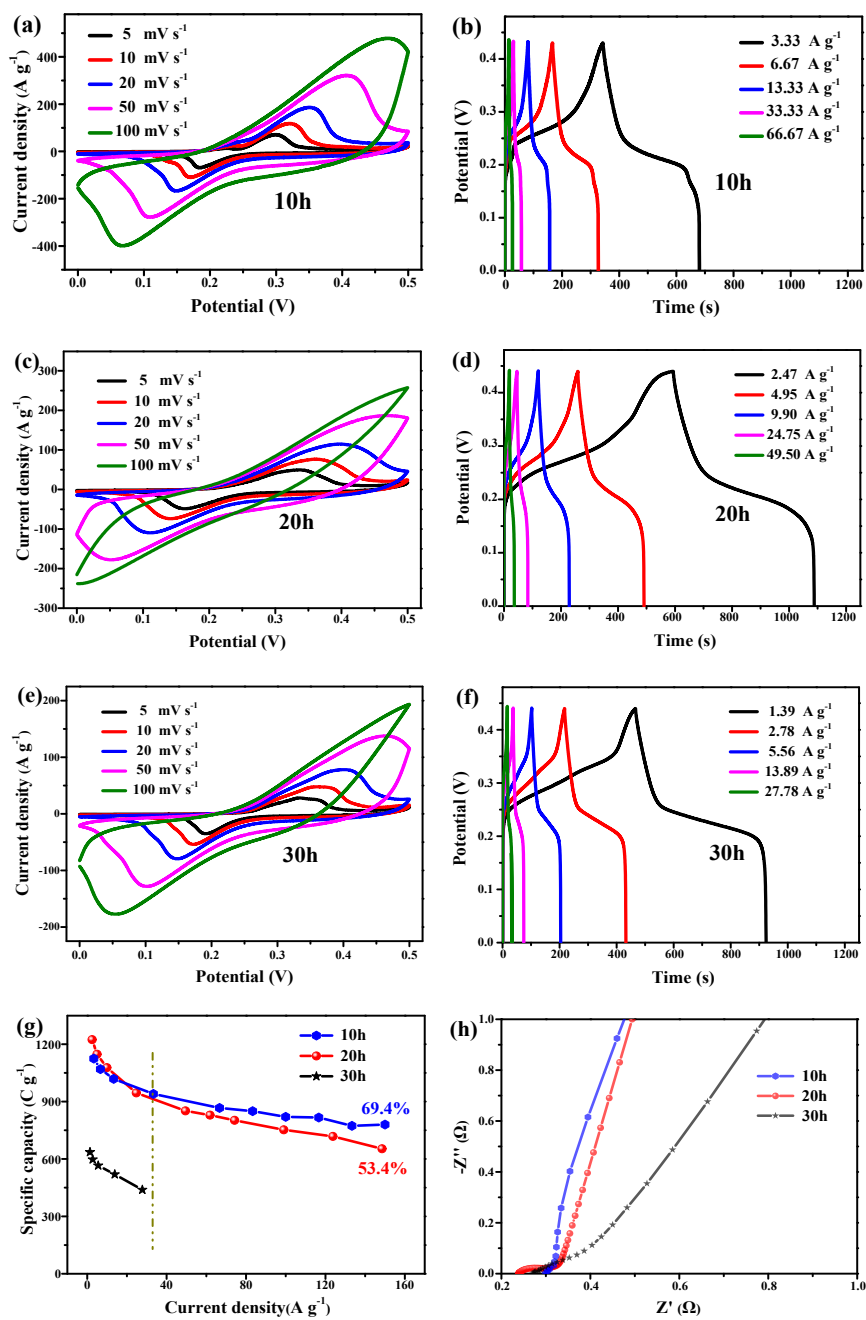

Fig. S4 Electrochemical performance of  $\text{NiCo}_2\text{S}_4$  deposited on nanoengineered NFs for different reaction time.
